# Supplementary material for: Microwave-Assisted Synthesis, Optical and Theoretical Characterization of Novel 2-(imidazo[1,5-a]pyridine-1-yl)pyridinium Salts
Source: MDPI journal article supplement (doi:10.3390/chemistry3030050), 2021-07-06
Supplement: s1 [file s1]

Archive with 1 entries (1 files):
- chemistry-1282510-supplementary.pdf
