# Supplementary material for: Microwave-Assisted Synthesis, Optical and Theoretical Characterization of Novel 2-(imidazo[1,5-a]pyridine-1-yl)pyridinium Salts
Source: MDPI journal article supplement (doi:10.3390/chemistry3030050), 2021-07-06
Supplement: s1 [file s1 › chemistry-1282510-supplementary.pdf]

# Supporting Materials

## Microwave-Assisted Synthesis, Optical and Theoretical Characterization of Novel 2-(imidazo[1,5-*a*]pyridine-1-yl)pyridinium Salts

Luca M. Cavinato <sup>1</sup>, Giorgio Volpi <sup>2,\*</sup>, Elisa Fresta <sup>1</sup>, Claudio Garino <sup>2</sup>, Andrea Fin <sup>3</sup> and Claudia Barolo <sup>2</sup>

<sup>1</sup> Chair of Biogenic Functional Materials, Technical University of Munich, Schulgasse 22, 94315 Straubing, Germany; luca.cavinato@tum.de (L.M.C.); elisa.fresta@tum.de (E.F.)

<sup>2</sup> Department of Chemistry, University of Turin, Via Pietro Giuria 7, 10125 Torino, Italy; claudio.garino@unito.it (C.G.); claudia.barolo@unito.it (C.B.)

<sup>3</sup> Department of Drug Science and Technology, University of Turin, Via Pietro Giuria 9, 10125 Torino, Italy; andrea.fin@unito.it

\* Correspondence: giorgio.volpi@unito.it

### NMR characterization

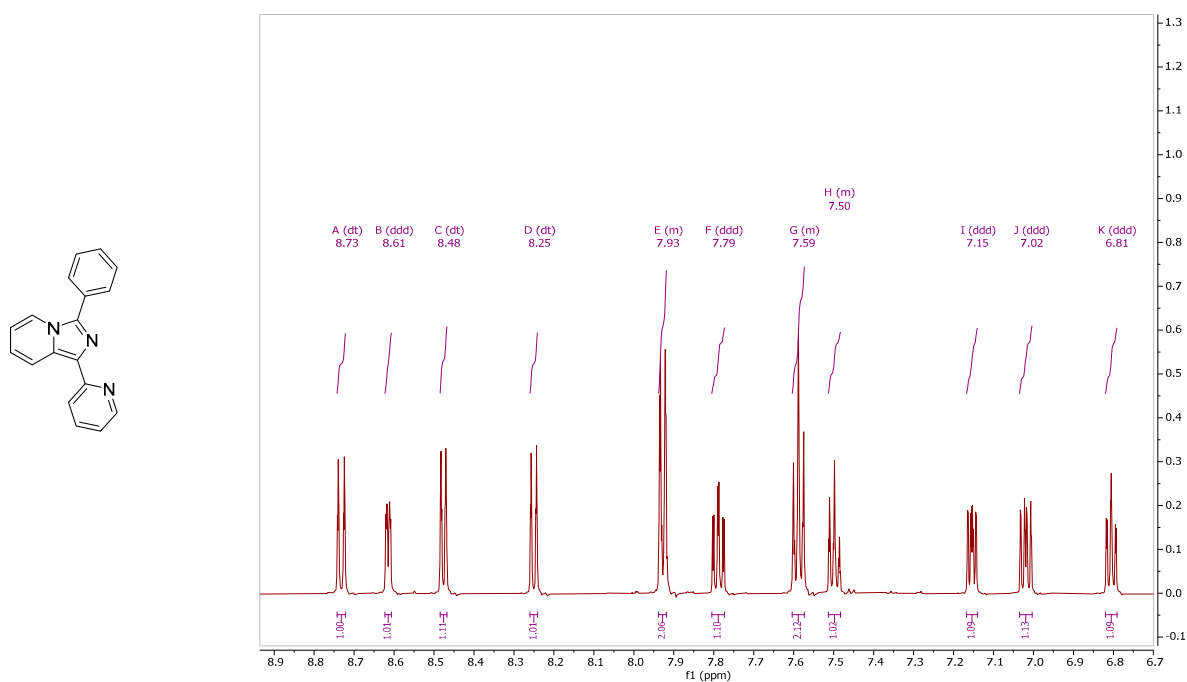

**Figure S1.** <sup>1</sup>H NMR spectrum of Acetone-*d*<sub>6</sub> solution of **1**

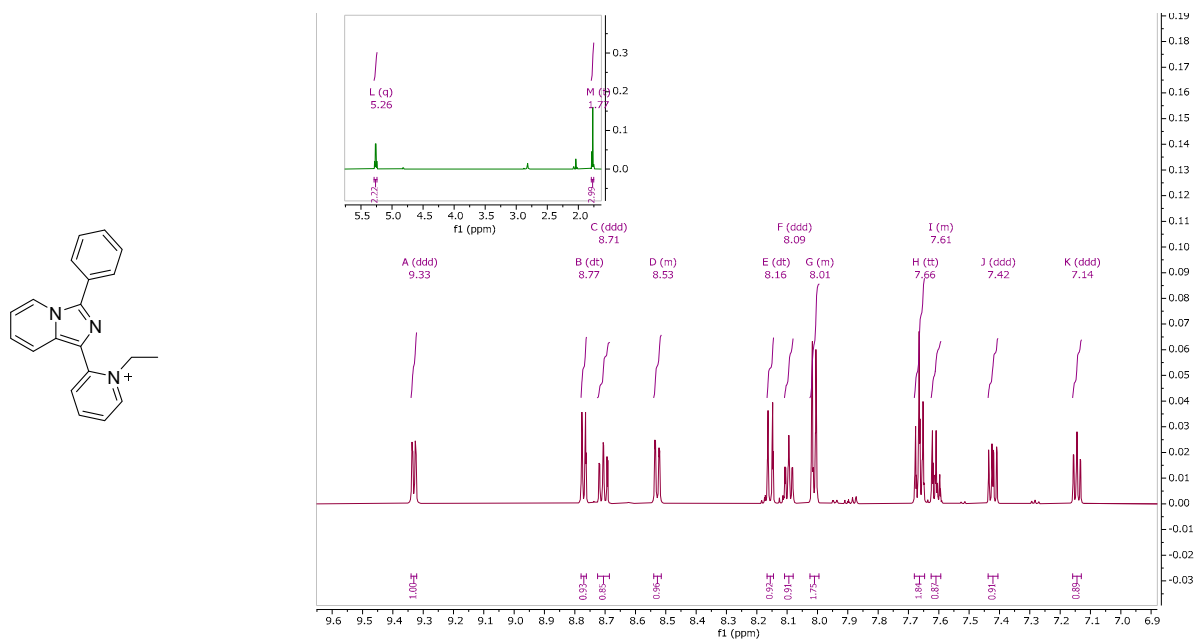

**Figure S2.**  $^1\text{H}$  NMR spectrum of Acetone- $\text{d}_6$  solution of **1q**. The aliphatic region is shown in the inset.

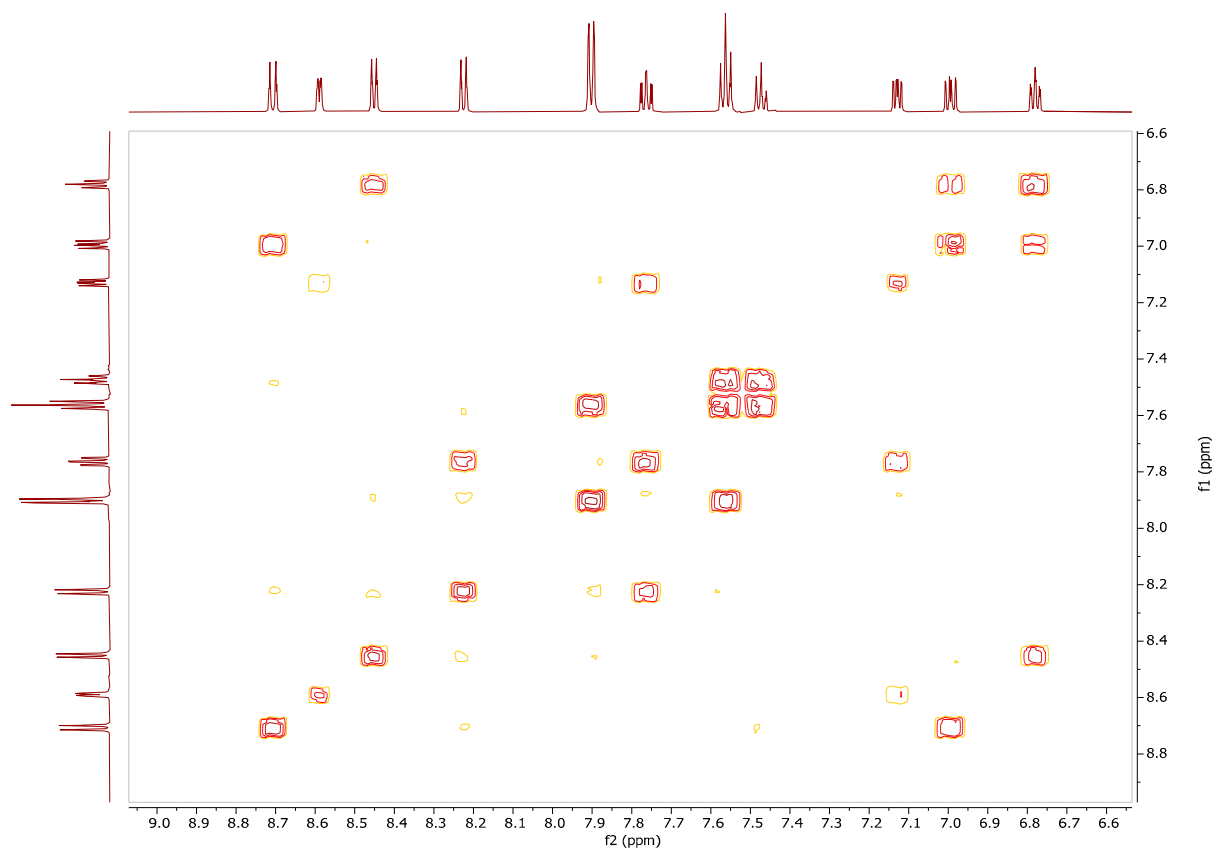

**Figure S3.** 2D  $^1\text{H}$ -COSY NMR spectrum of Acetone- $\text{d}_6$  solution of **1**

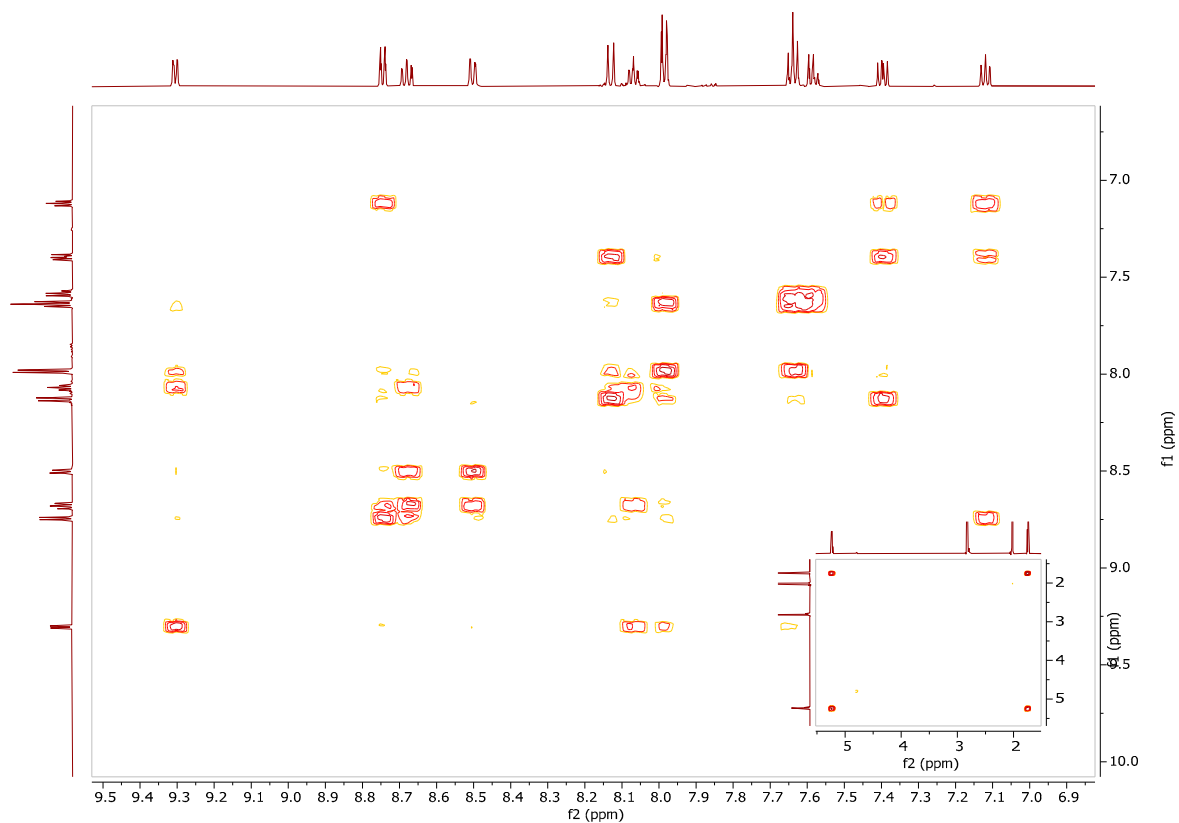

**Figure S4.** 2D  $^1\text{H}$ -COSY NMR spectrum of Acetone- $\text{d}_6$  solution of **1q**. The aliphatic region is shown in the inset.

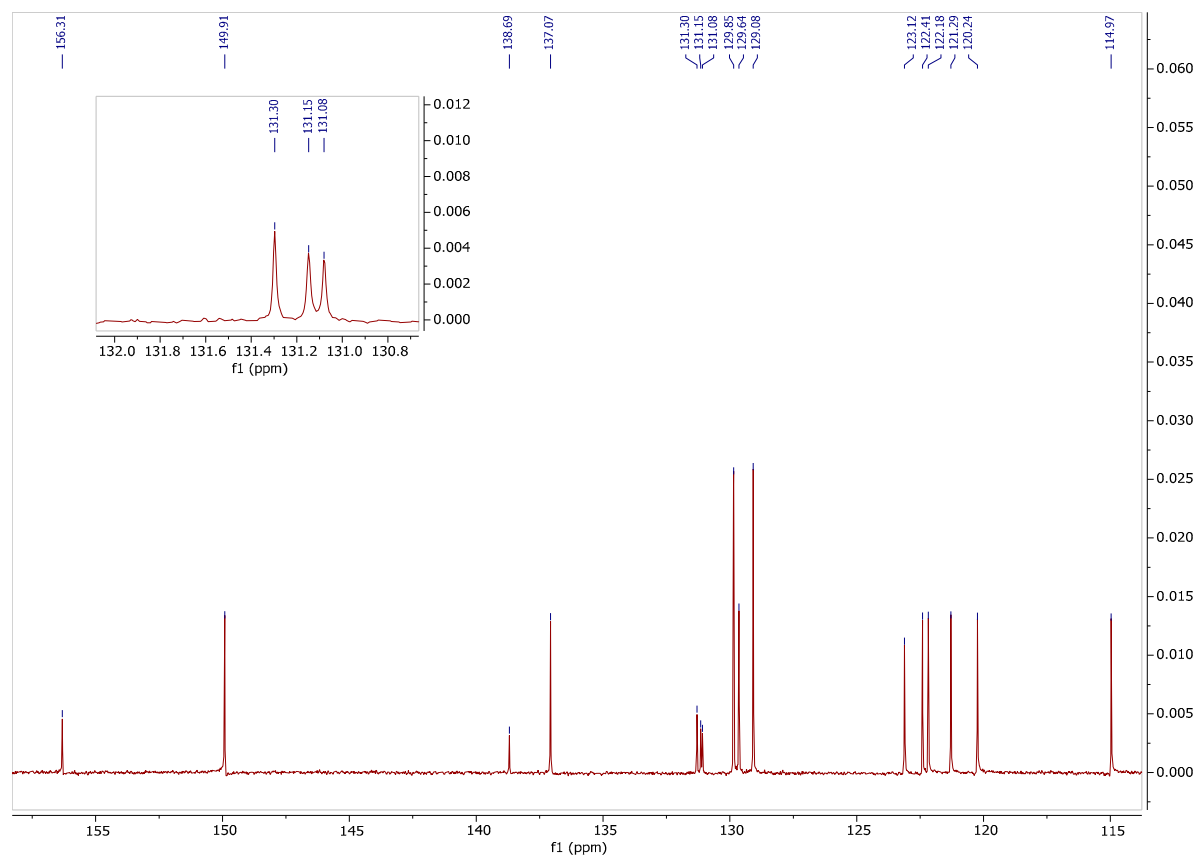

**Figure S5.**  $^{13}\text{C}$  NMR spectrum of Acetone- $\text{d}_6$  solution of **1**

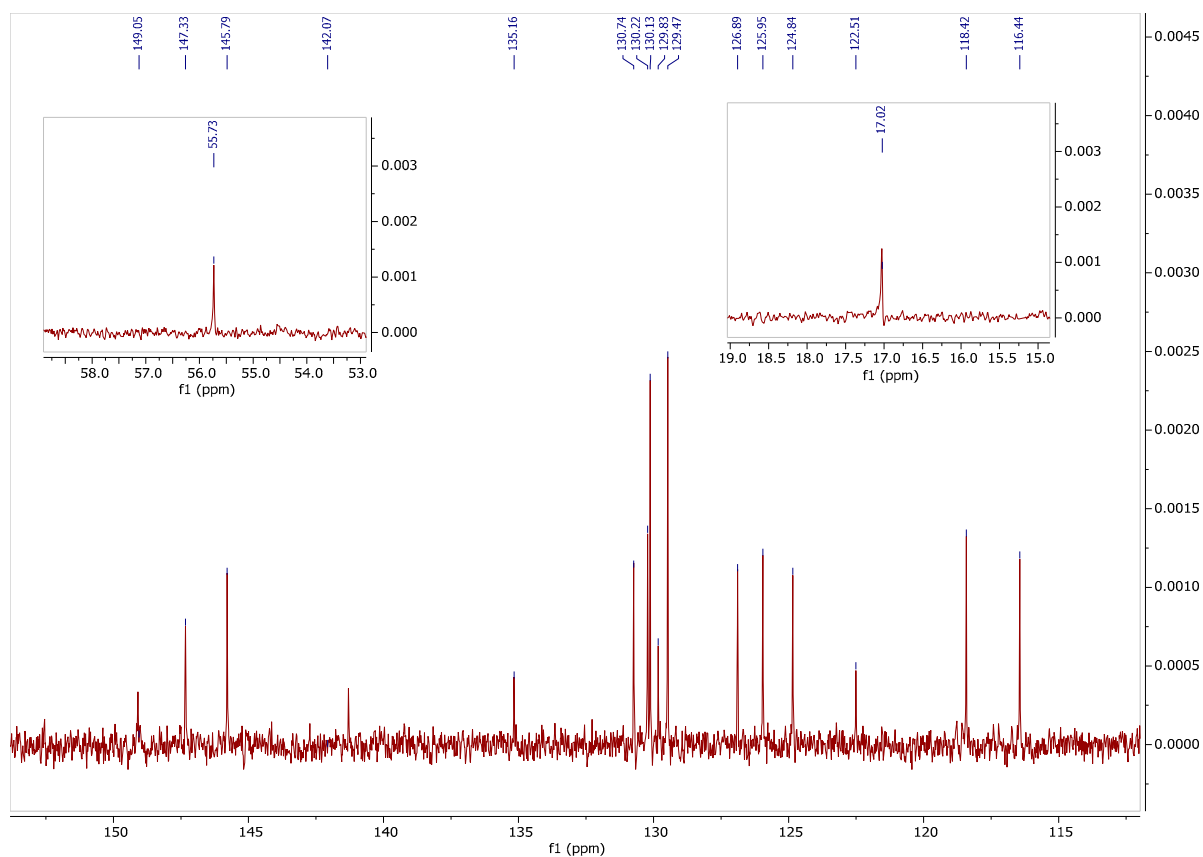

**Figure S6.**  $^{13}\text{C}$  NMR spectrum of Acetone- $\text{d}_6$  solution of **1q**. The aliphatic region is shown in the inset.

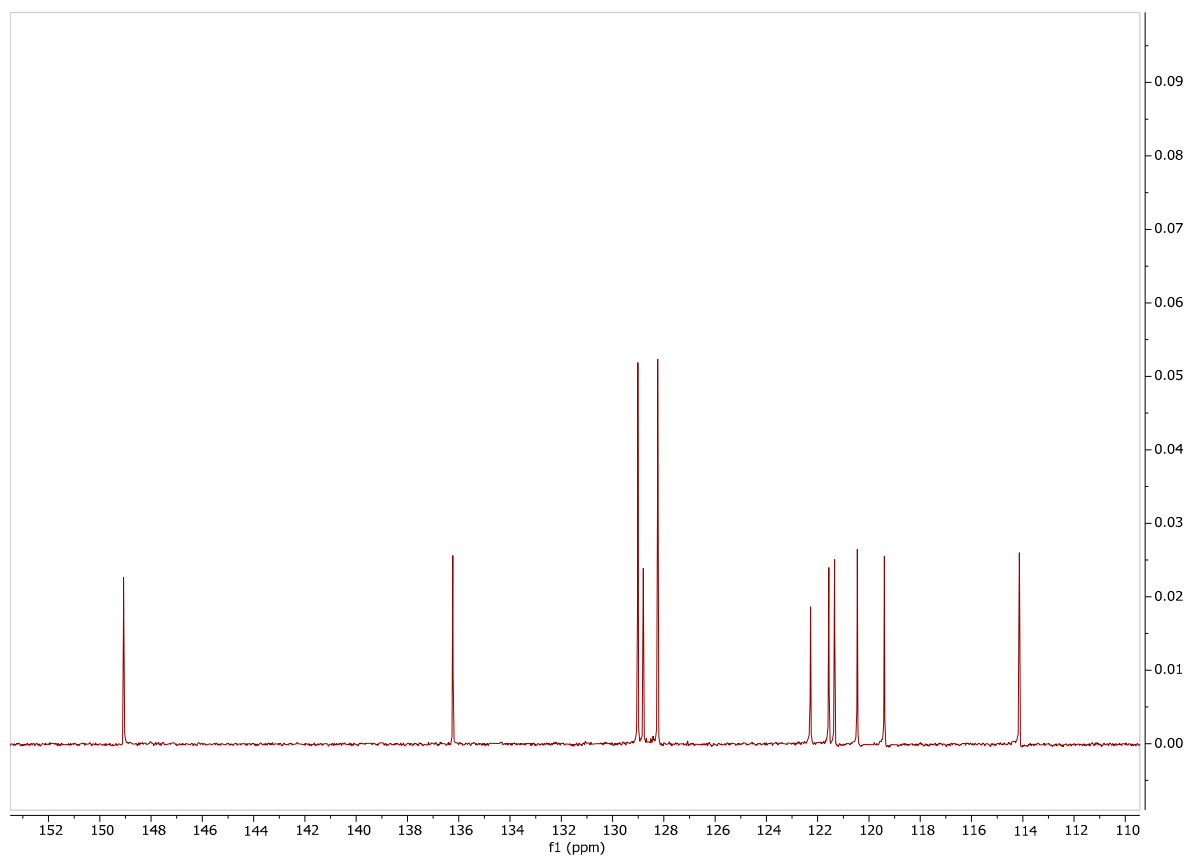

**Figure S7.**  $^{13}\text{C}$  DEPT-135 NMR spectrum of Acetone- $\text{d}_6$  solution of **1**.

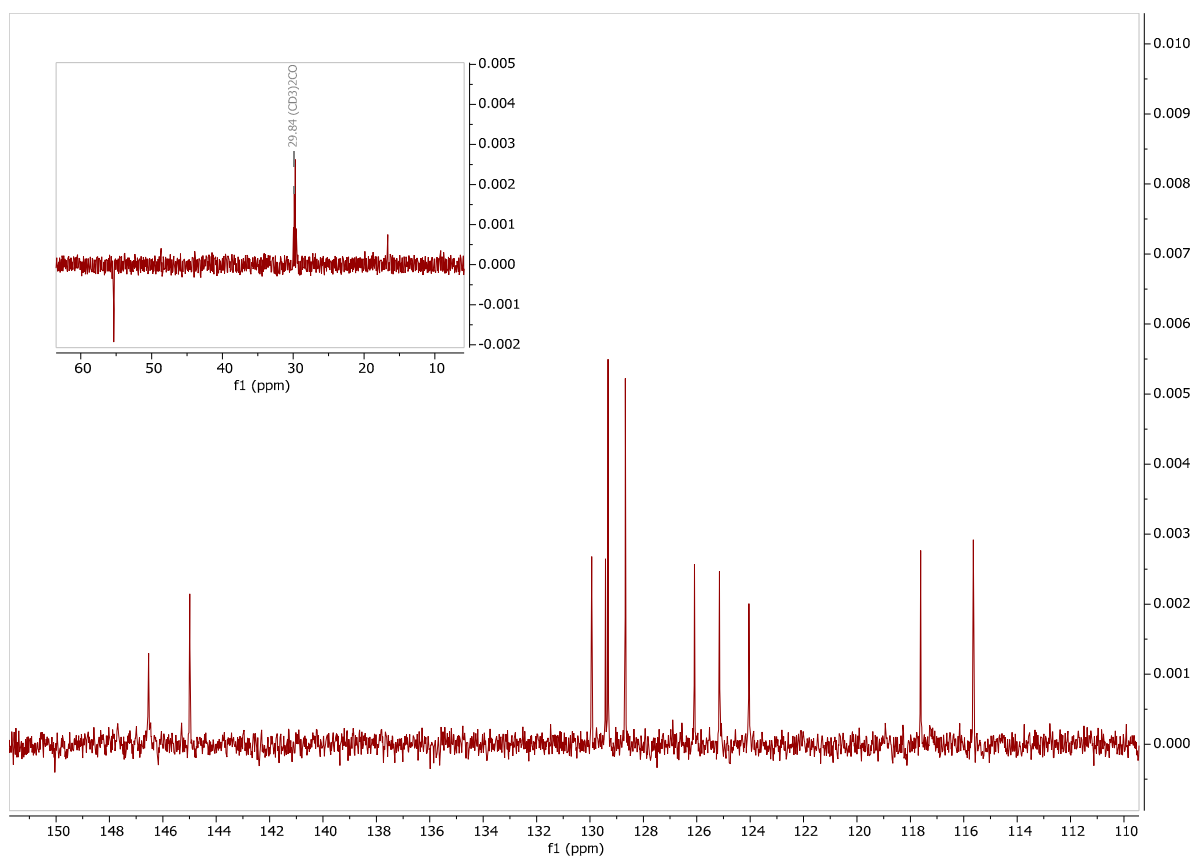

**Figure S8.**  $^{13}\text{C}$  DEPT-135 NMR spectrum of Acetone- $\text{d}_6$  solution of **1q**. The aliphatic region is shown in the inset.

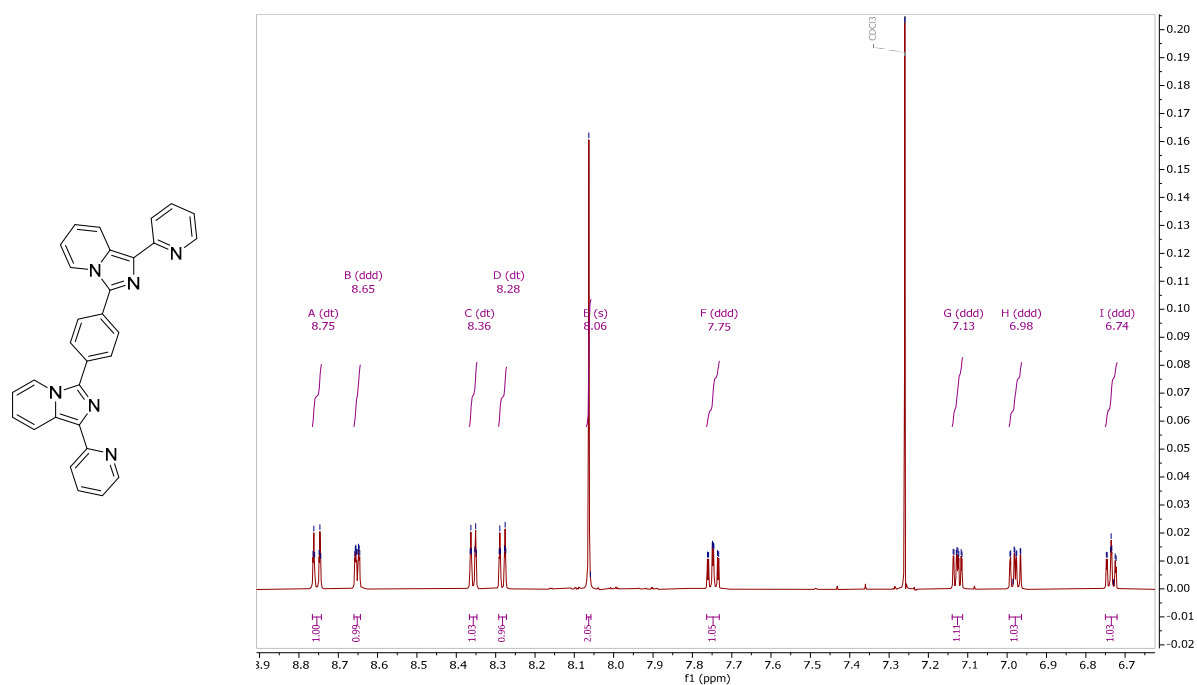

**Figure S9.**  $^1\text{H}$  NMR spectrum of Chloroform- $\text{d}_3$  solution of **2**. Due to the symmetry of the system only half of the  $^1\text{H}$  nuclei are shown.

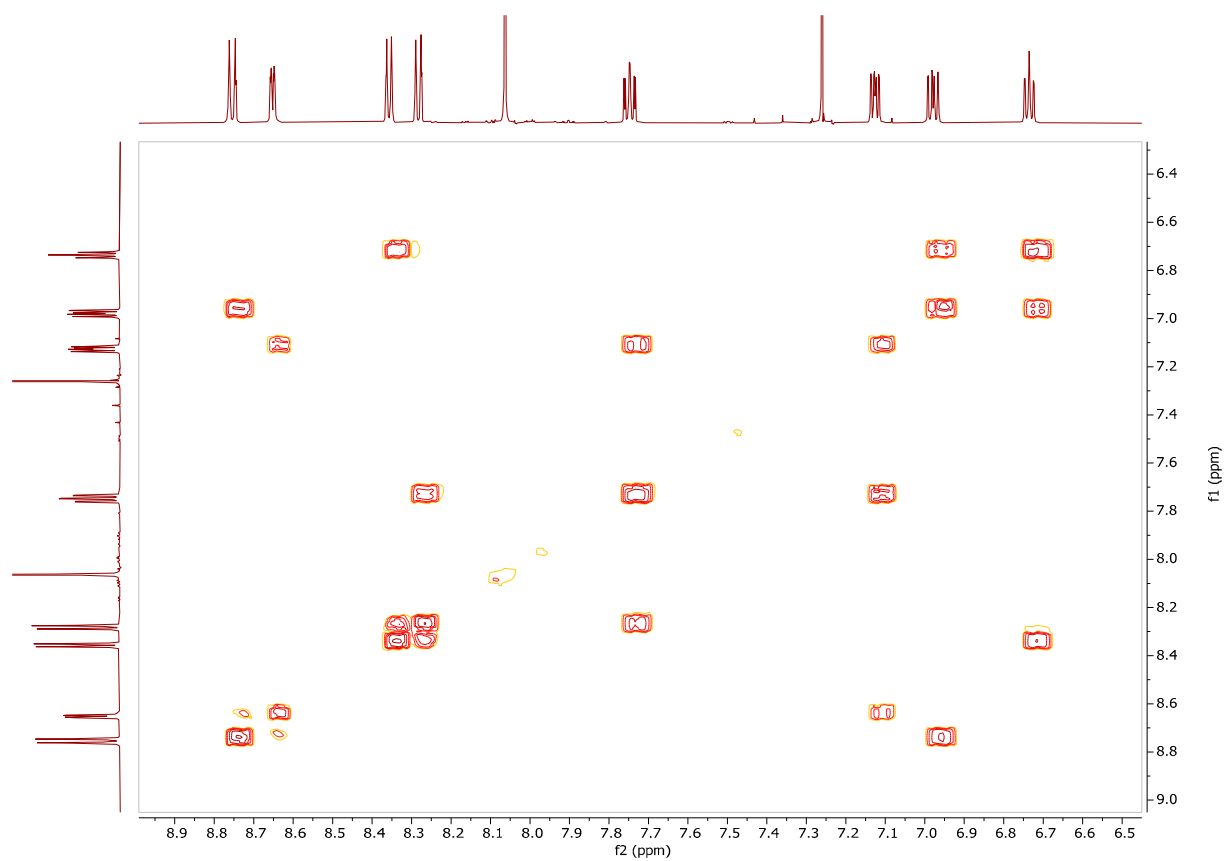

**Figure S10.** 2D  $^1\text{H}$  COSY-NMR spectrum of Chloroform- $\text{d}_3$  solution of **2**.

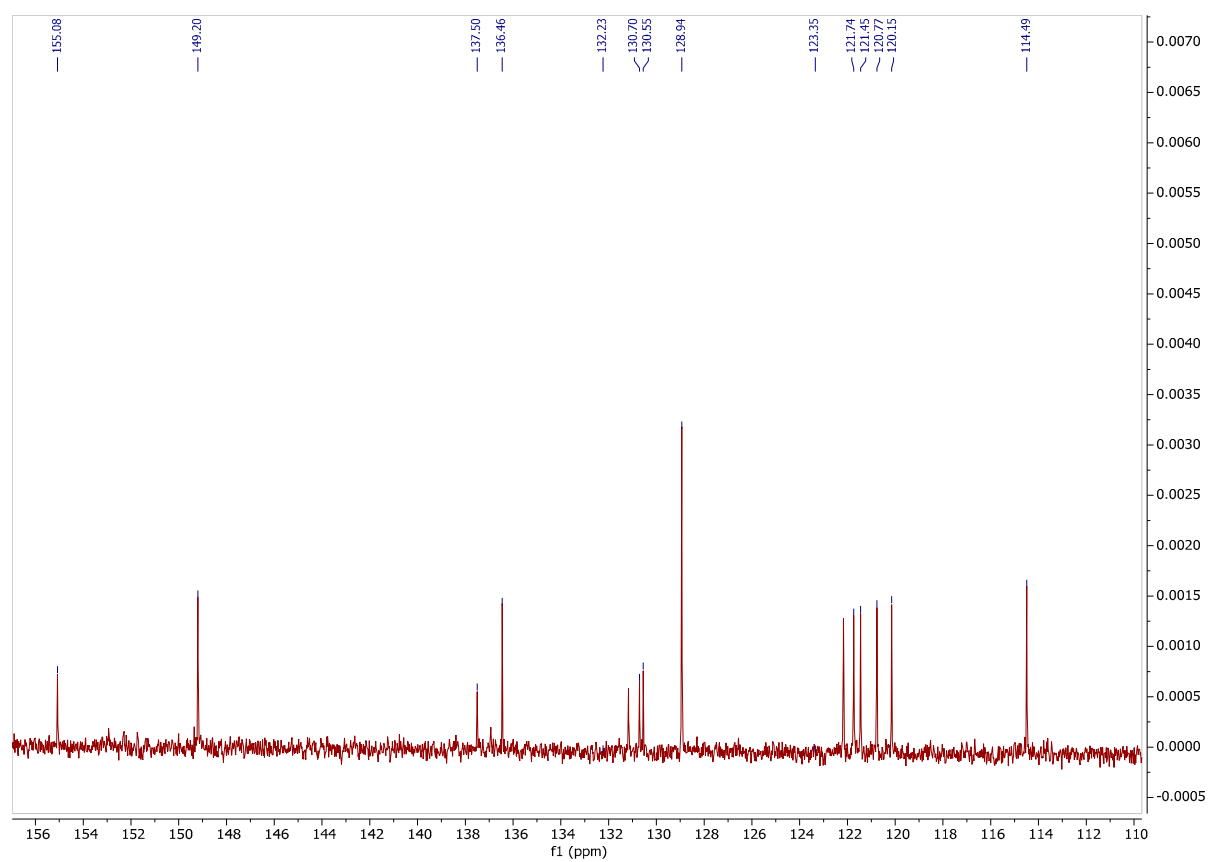

**Figure S11.**  $^{13}\text{C}$  NMR spectrum of Chloroform- $\text{d}_3$  solution of **2**.

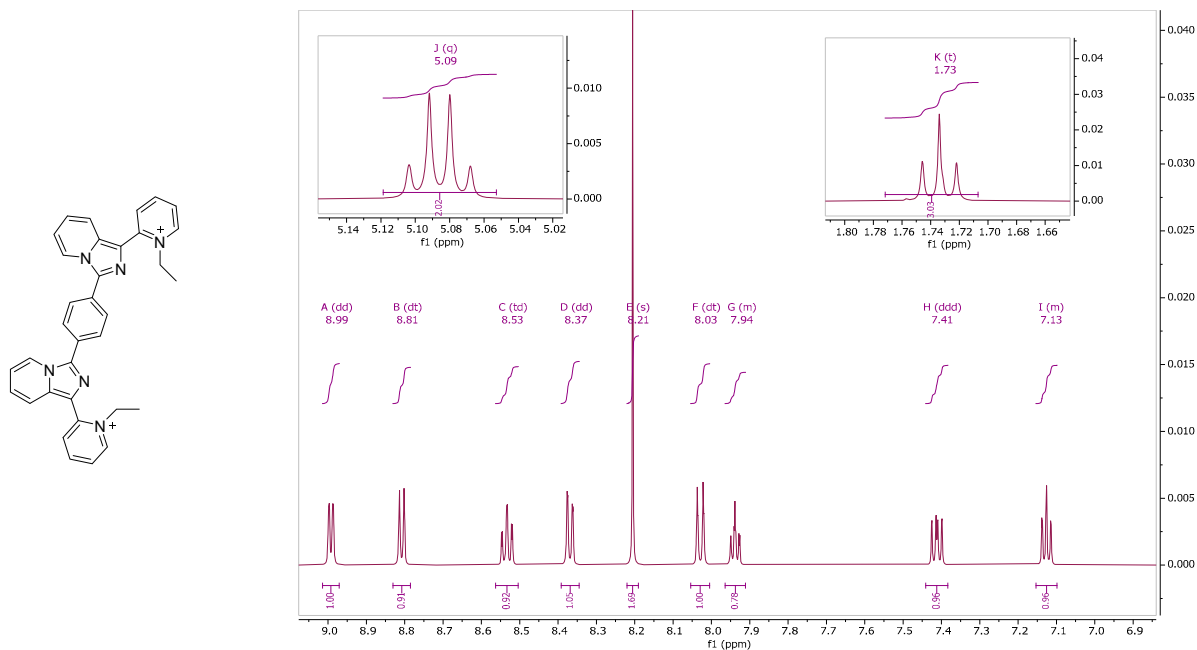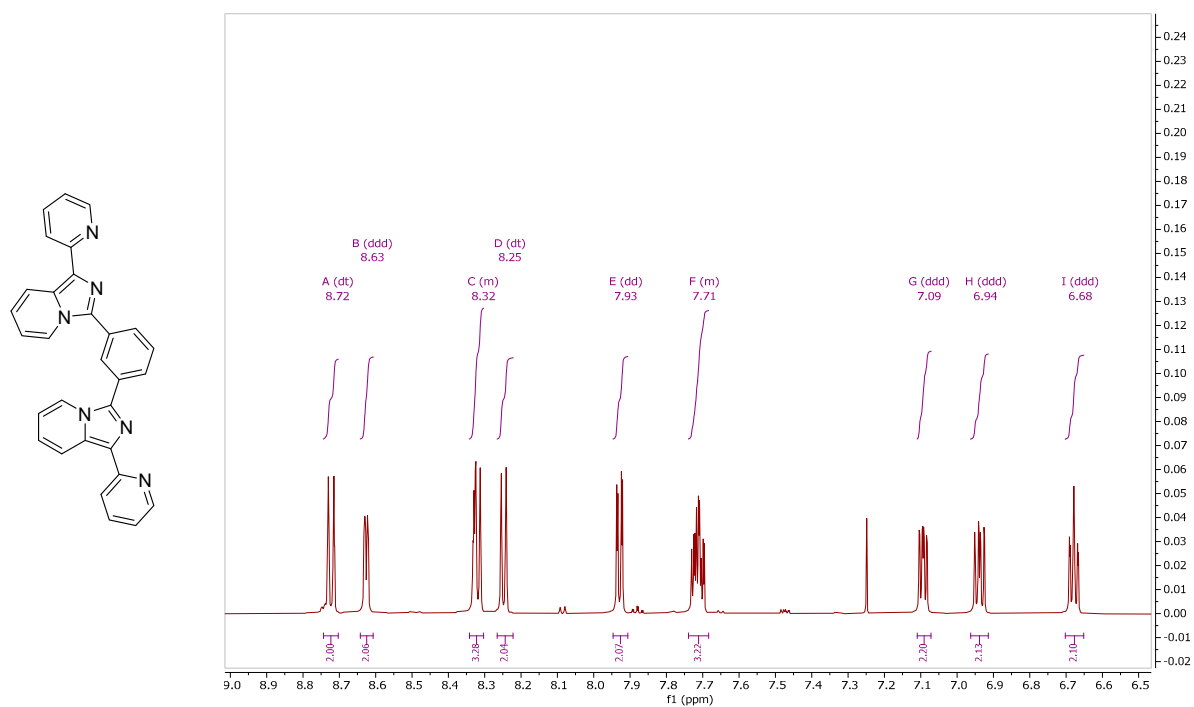

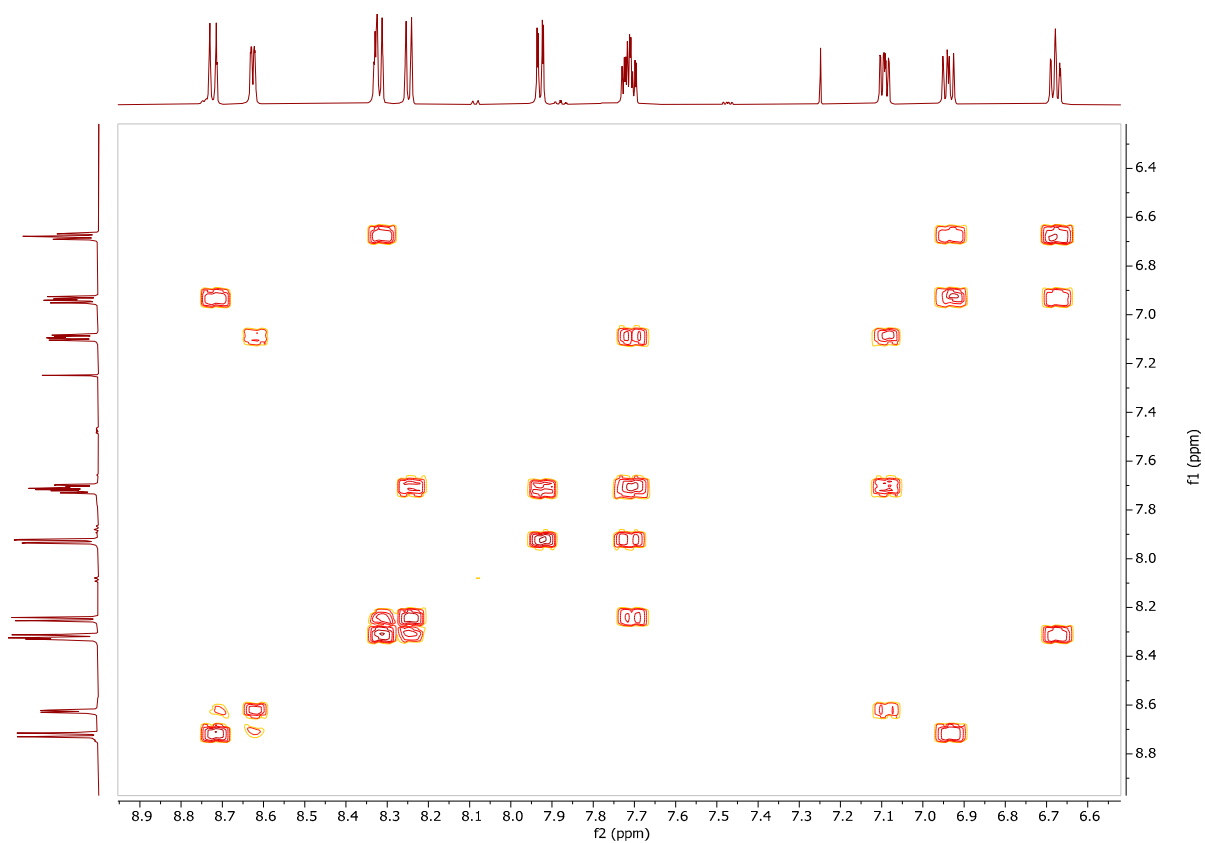

**Figure S14.** 2D  $^1\text{H}$  COSY-NMR spectrum of Chloroform- $\text{d}_3$  solution of **3**.

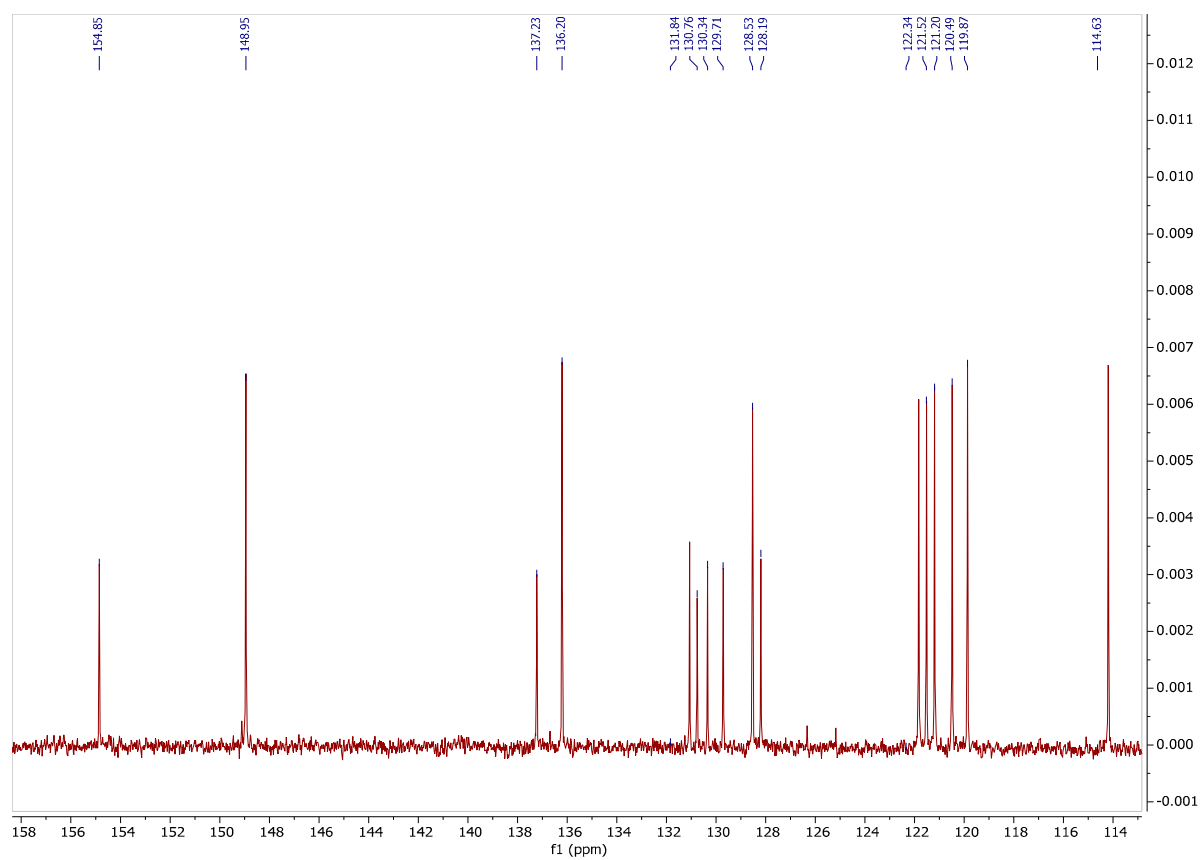

**Figure S15.**  $^{13}\text{C}$  NMR spectrum of Chloroform- $\text{d}_3$  solution of **3**.

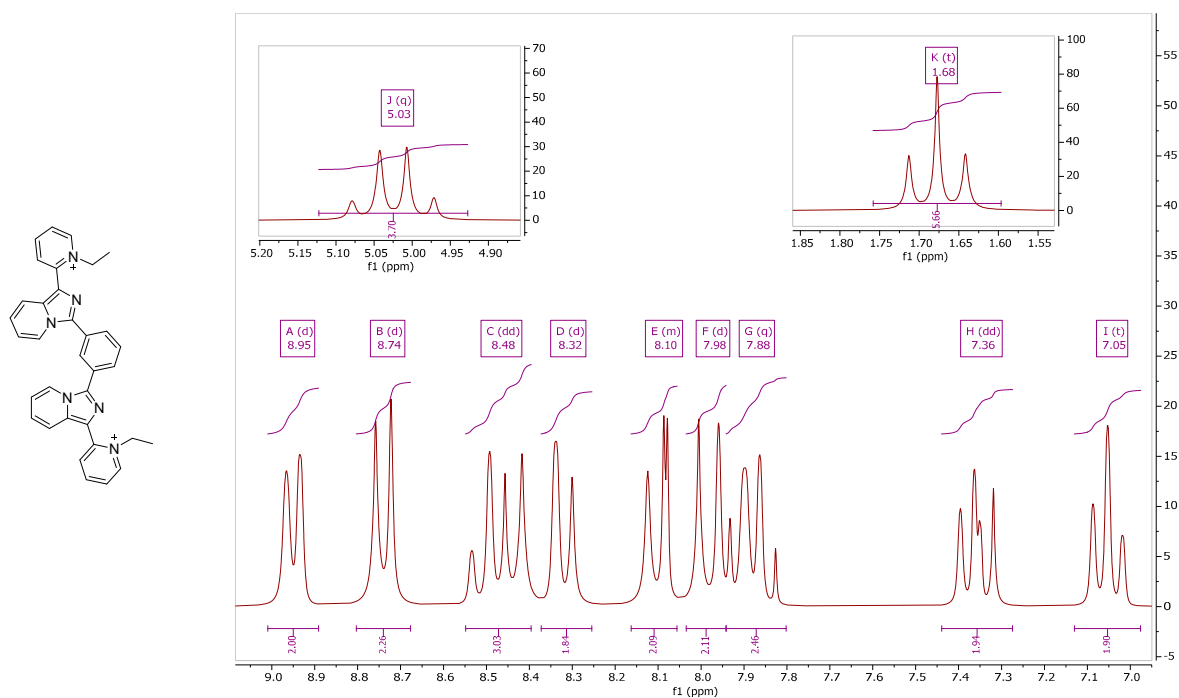

**Figure S16.** <sup>1</sup>H NMR spectrum of Methanol-d<sub>4</sub> solution of **3q**. The aliphatic region is shown in the inset.

#### Computational details

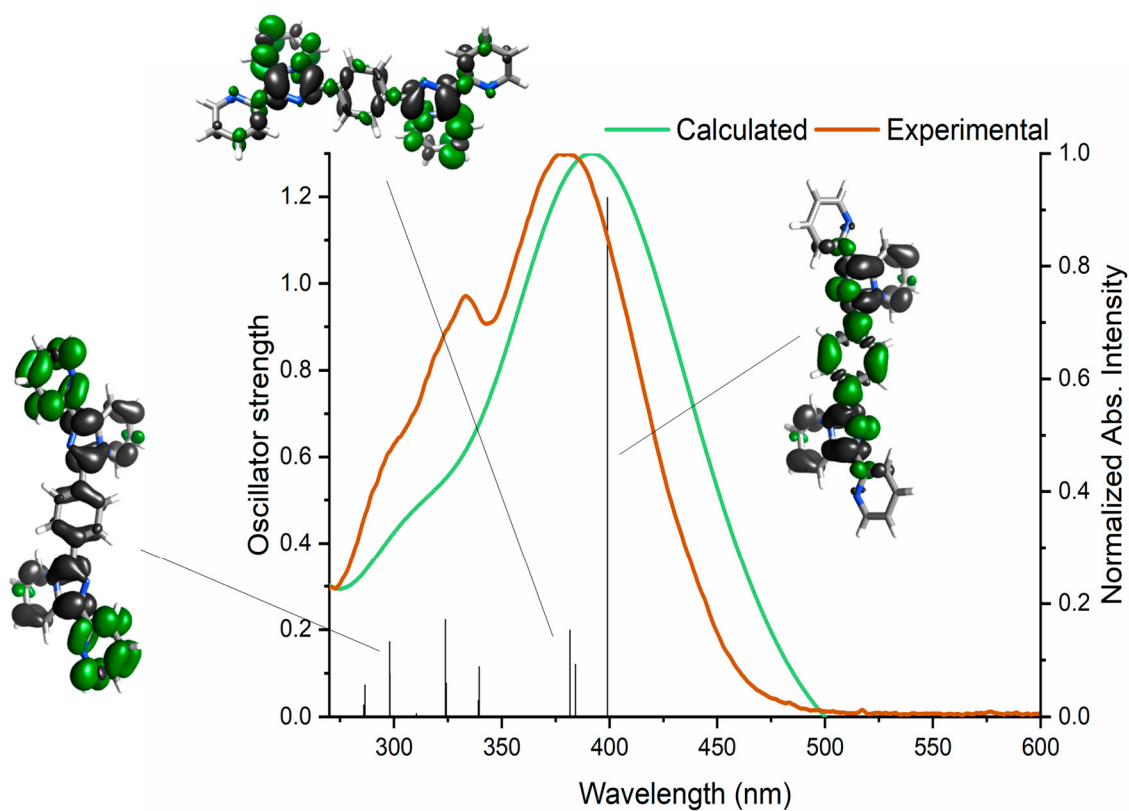

**Figure S17.** Experimental (orange) and calculated (green) absorption spectra of **2**. The EDDMs of the most relevant transitions are shown.

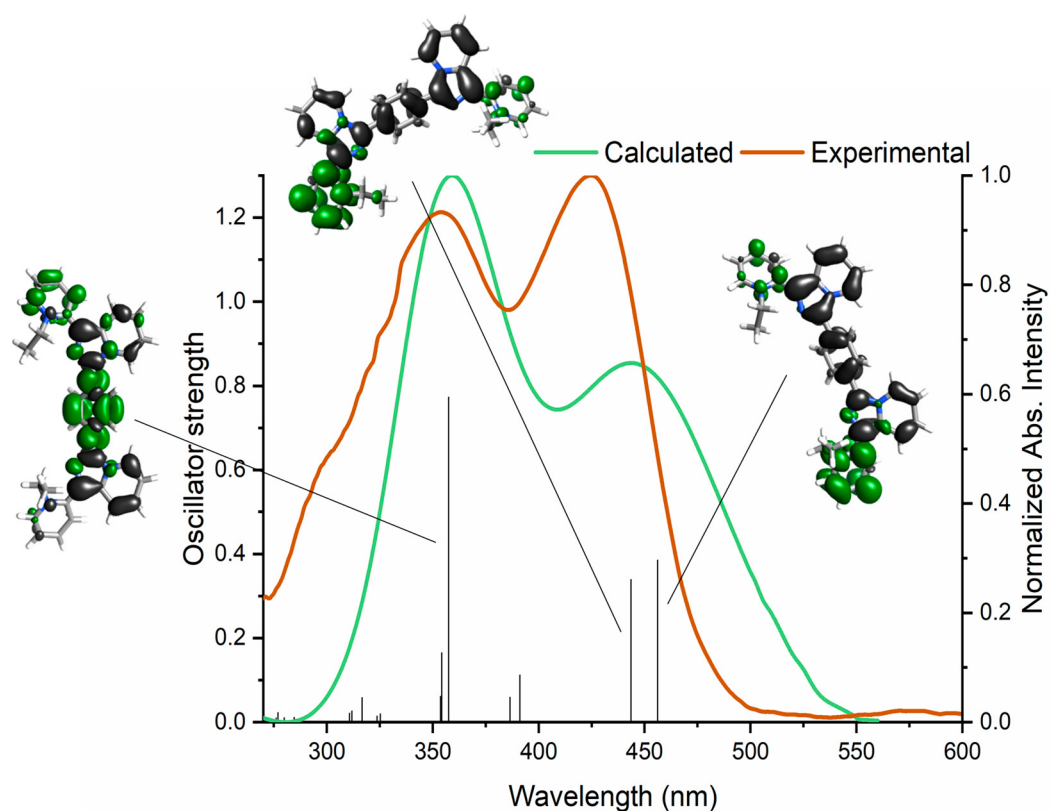

**Figure S18.** Experimental (orange) and calculated (green) absorption spectra of **2q**. The EDDMs of the most relevant transitions are shown.

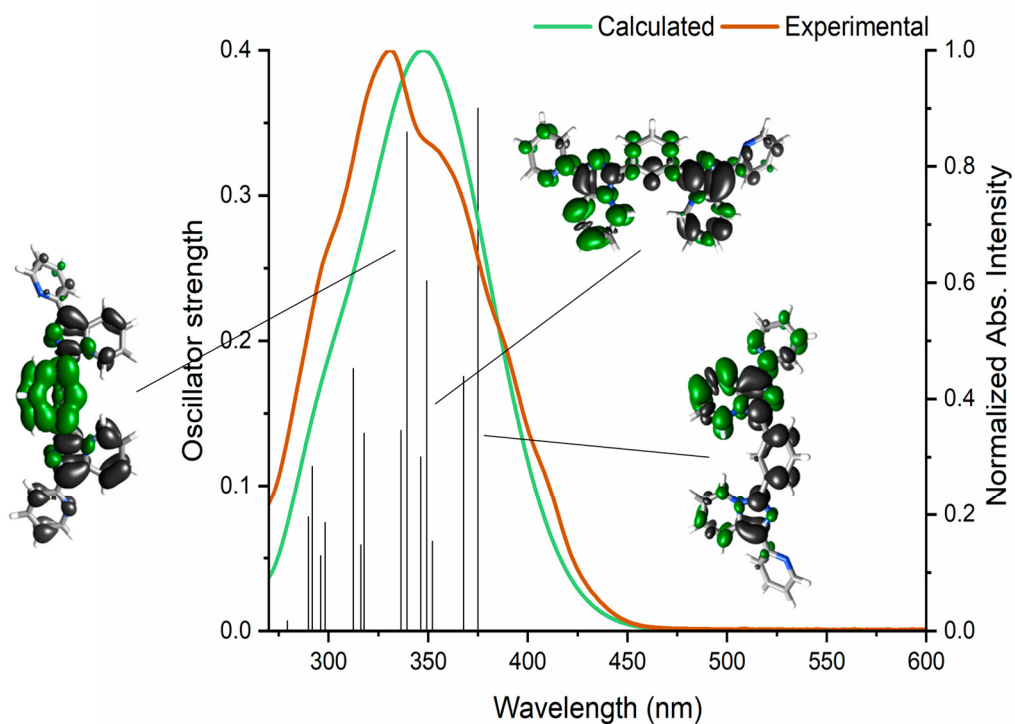

**Figure S19.** Experimental (orange) and calculated (green) absorption spectra of **3**. The Electron Density Difference Map (EDDM) of the most relevant transitions are shown.

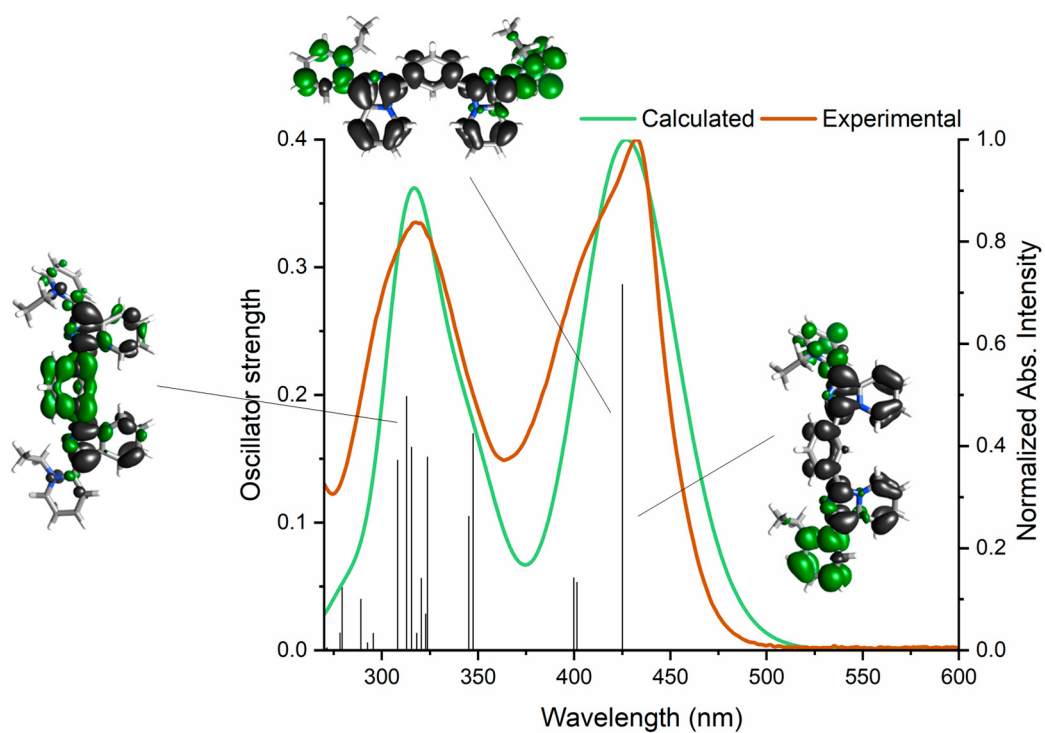

**Figure S20.** Experimental (orange) and calculated (green) absorption spectra of **3q**. The Electron Density Difference Map (EDDM) of the most relevant transitions are shown.

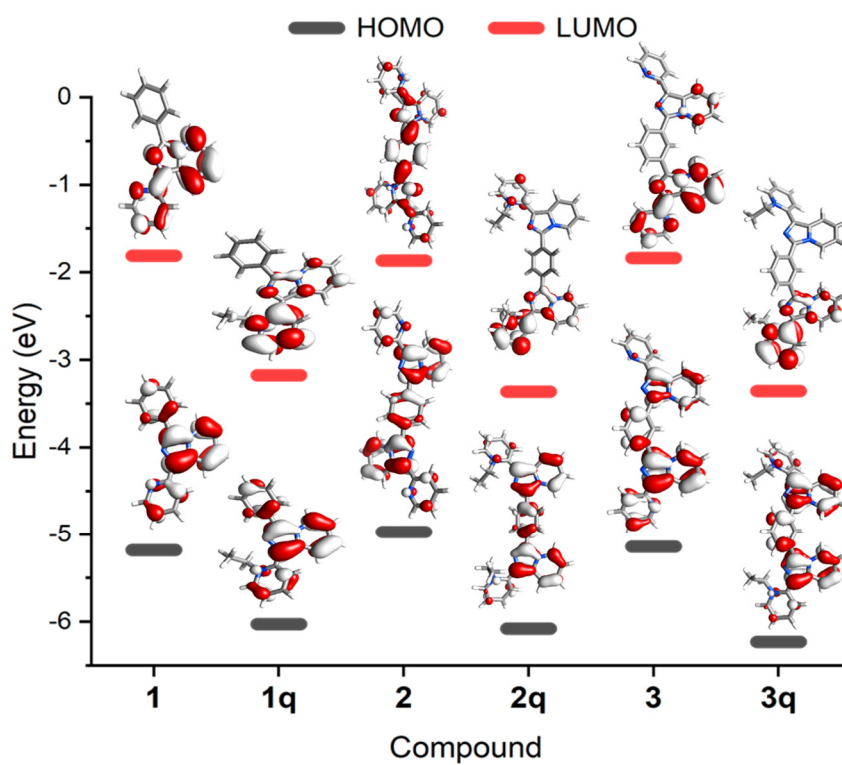

**Figure S21.** Molecular orbital plots (LUMO and HOMO) of the reported compounds.

## Photophysical characterization in thin film

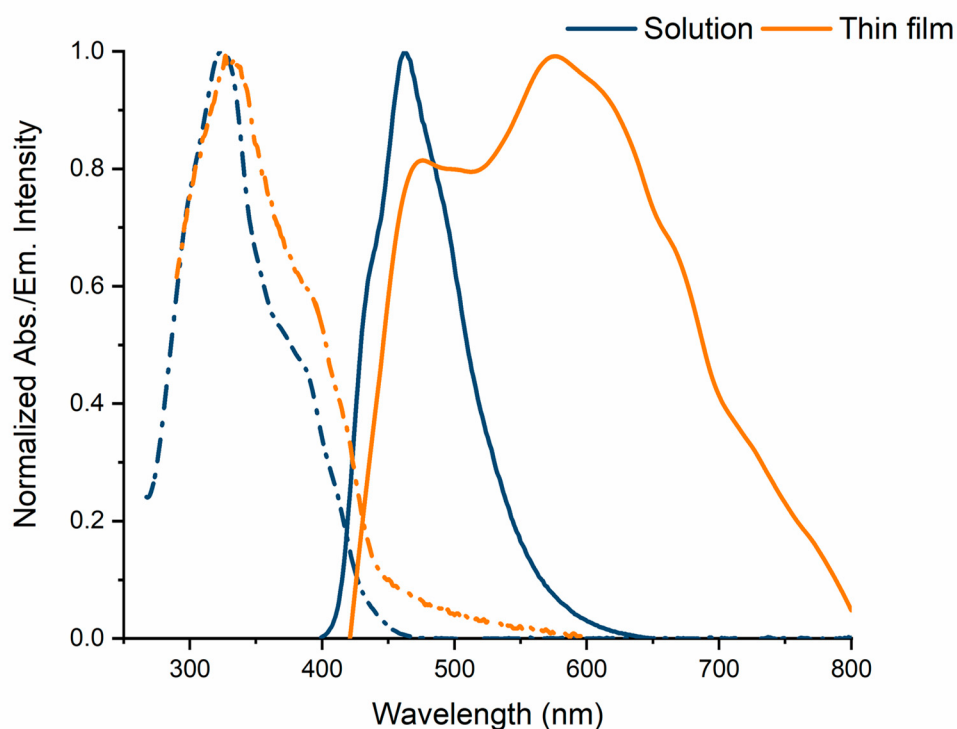

**Figure S22.** Absorption (dashed lines) and emission (solid lines) spectra of **1** recorded in DCM solution (concentration  $10^{-5}$  M) (blue) and in thin film (orange)

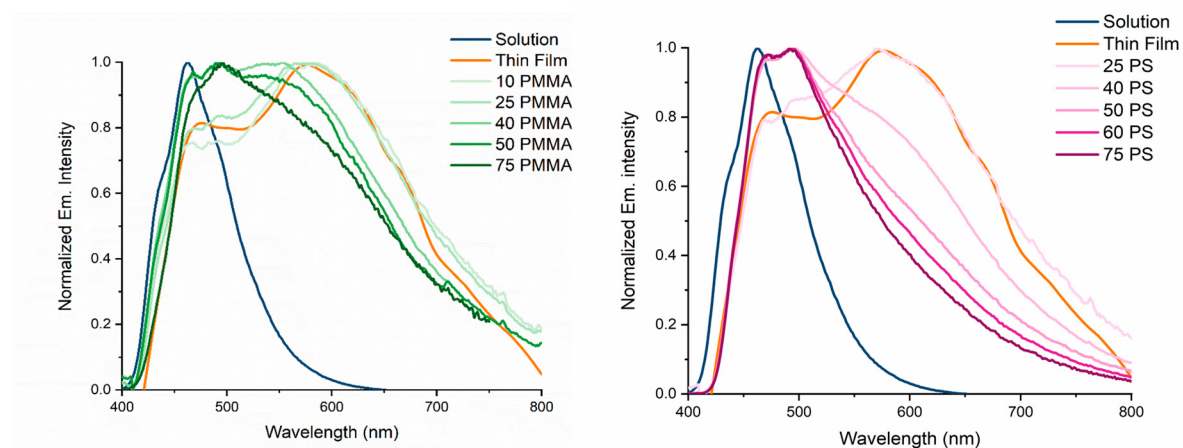

**Figure S23.** Emission spectra of **1** recorded in different conditions: DCM solution, thin film, blended in PMMA and in PS – See Legend.

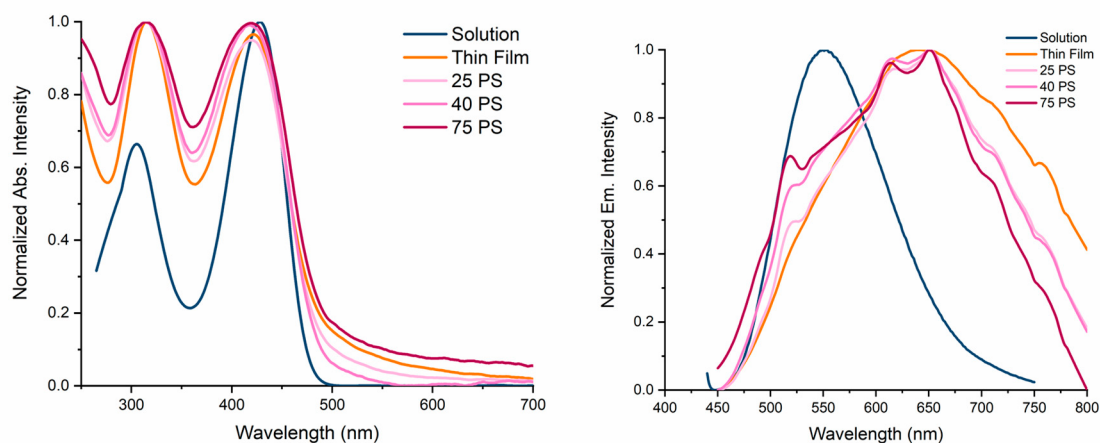

**Figure S24.** Absorption (left) and emission (right) spectra of **1q** recorded in DCM solution (concentration  $10^{-5}$  M), in thin film and blended in PS matrix

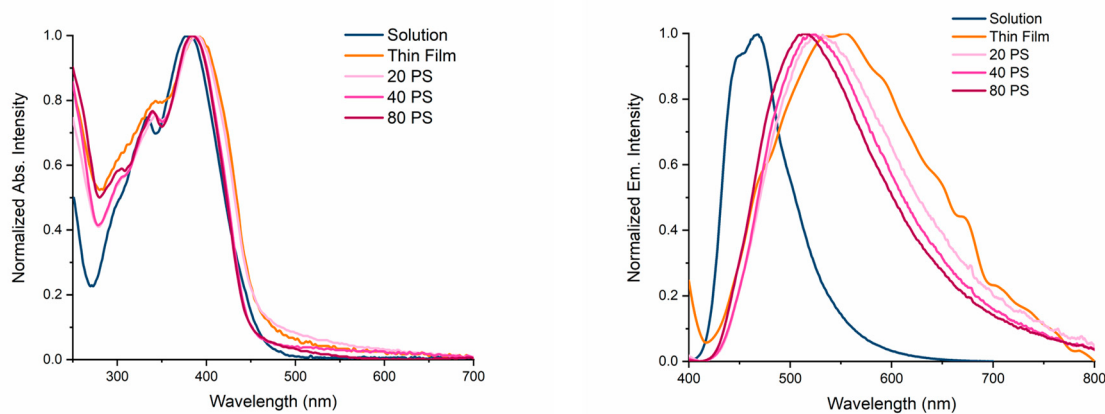

**Figure S25.** Absorption (left) and emission (right) spectra of **2** recorded in DCM solution (concentration  $10^{-5}$  M), in thin film and blended in PS matrix

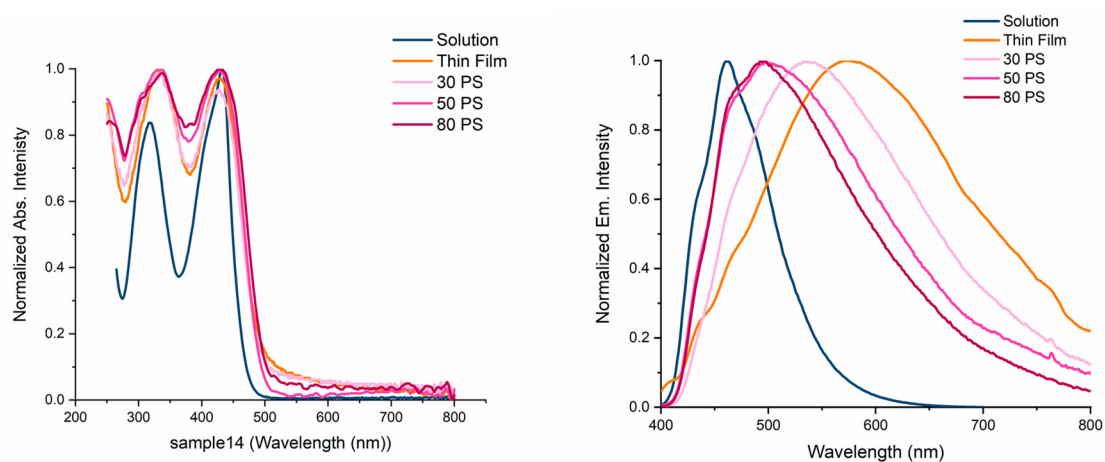

**Figure S26.** Absorption (left) and emission (right) spectra of **3** recorded in DCM solution (concentration  $10^{-5}$  M), in thin film and blended in PS matrix

**Table S1.** Photophysical characterization of **2** and **3** in pristine thin film or with different %wt of polymeric matrices.

| Compound | Conditions       | $\lambda_{em}/nm$ | $\phi/\%$<br>( $\lambda_{ex}/nm$ ) | $\langle\tau\rangle/ns$ | $k_{rad}/s^{-1}$ | $k_{nrad}/s^{-1}$ |
|----------|------------------|-------------------|------------------------------------|-------------------------|------------------|-------------------|
| <b>2</b> | <b>Solution</b>  | 466               | 22 (380)                           | 6.27                    | 3.51E+07         | 1.24E+08          |
|          | <b>Thin film</b> | 550               | <5 (385)                           | 2.56                    | 5.31E+06         | 3.85E+08          |
|          | <b>25% PS</b>    | 530               | <5 (385)                           | 2.34                    | 9.75E+06         | 4.18E+08          |
|          | <b>40% PS</b>    | 525               | <5 (385)                           | 2.96                    | 1.27E+07         | 3.26E+08          |
|          | <b>80% PS</b>    | 515               | <5 (385)                           | 2.4                     | 2.45E+07         | 3.92E+08          |
| <b>3</b> | <b>Solution</b>  | 461               | 19 (330)                           | 5.76                    | 3.30E+07         | 1.41E+08          |
|          | <b>Thin film</b> | 572               | <5 (340)                           | 4.21                    | 1.74E+06         | 2.36E+08          |
|          | <b>25% PS</b>    | 538               | <5 (340)                           | 3.99                    | 6.09E+06         | 2.45E+08          |
|          | <b>40% PS</b>    | 492               | <5 (340)                           | 2.83                    | 1.30E+07         | 3.41E+08          |
|          | <b>80% PS</b>    | 492               | <5 (340)                           | 3.32                    | 1.34E+07         | 2.88E+08          |
